# Supplementary material
Source: PubMed Central journal article supplement (PMC3479492)
Supplement: 1212247109_pnas.201212247SI.pdf [file 1212247109_pnas.201212247SI.pdf]

# Supporting Information

Supporting Information Corrected November 28, 2012

Fang et al. 10.1073/pnas.1212247109

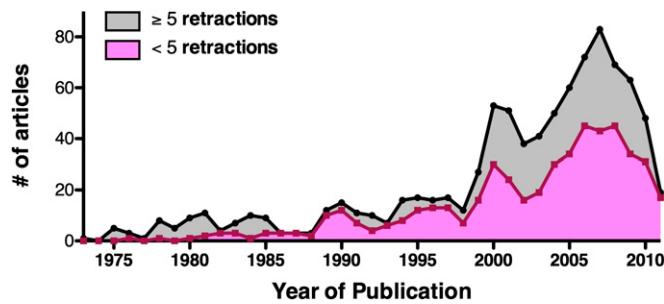

Fig. S1. The impact of research groups with multiple retractions. Thirty-eight laboratories with greater than or equal to five retractions accounted for 43.9% ( $n = 390$ ) of retractions for fraud or suspected fraud ( $n = 889$ ).

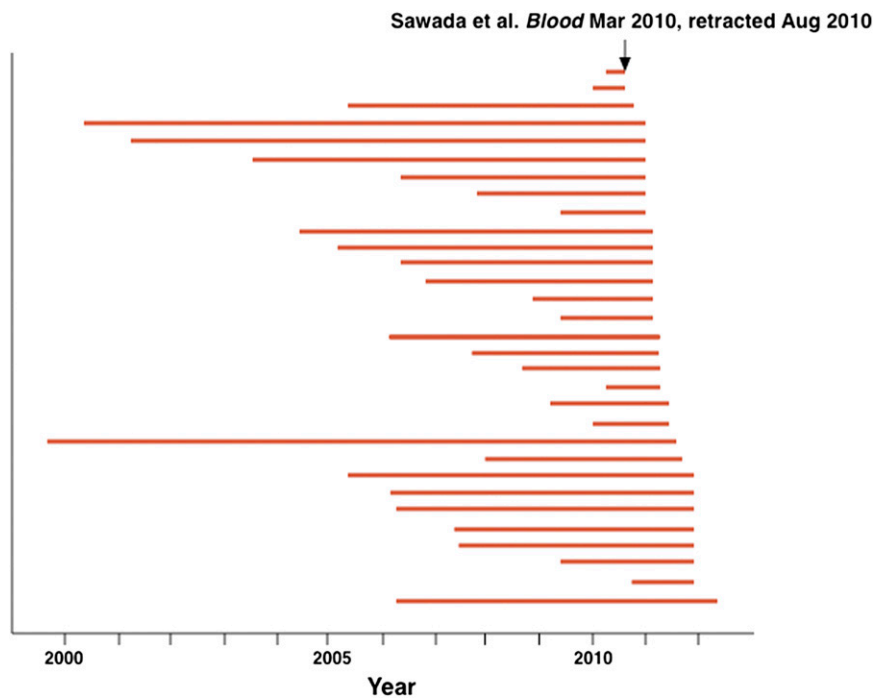

Fig. S2. Timeline of retracted articles from the laboratory of N. Mori. Each line represents one article and the length of the line is proportional to the time from publication to retraction.

**Wakefield, *Lancet*, 1998**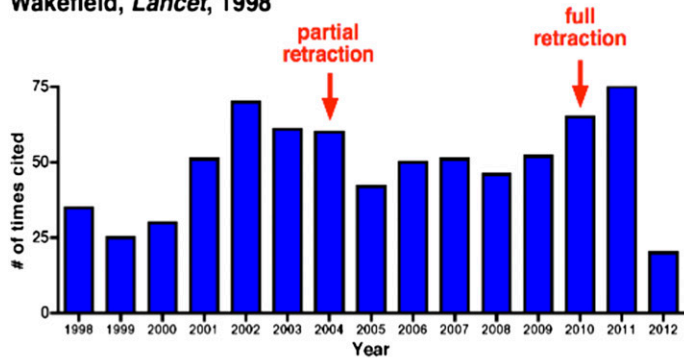**Fukuhara, *Science*, 2005**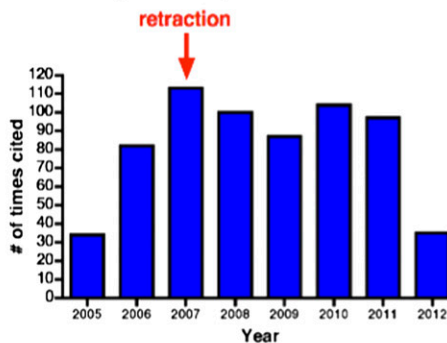**Chang, *Science*, 2001**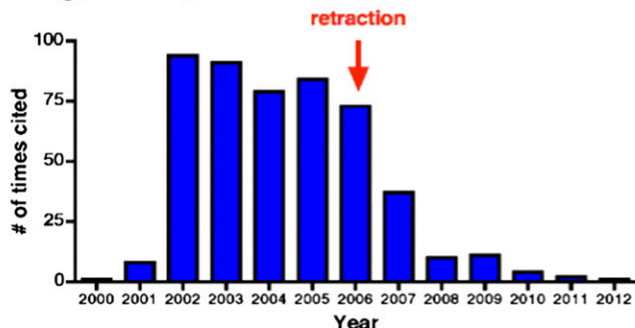**Kugler, *Nat Med*, 2000**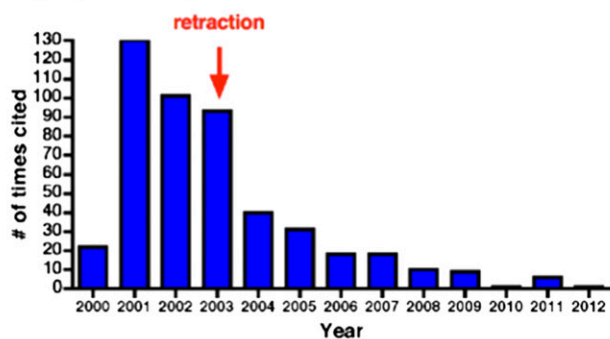**Gowen, *Science*, 1998**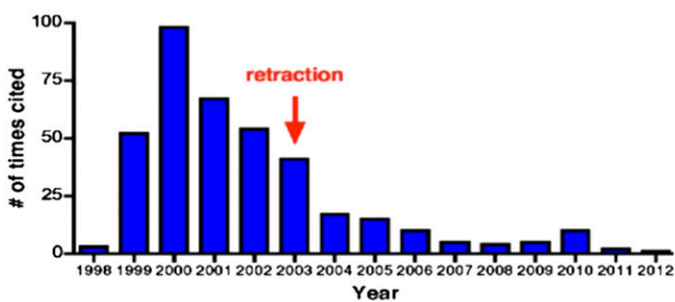**Makarova, *Nature*, 2001**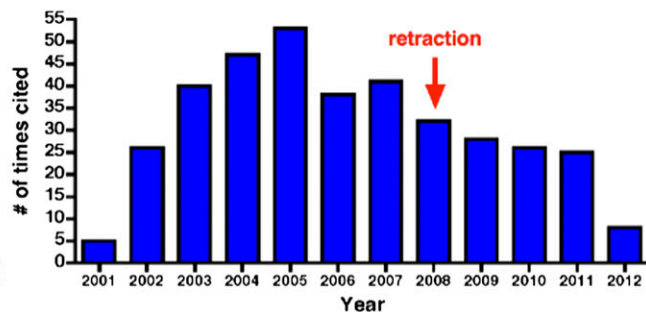

Fig. S3. Rates of citation following retraction of selected highly cited articles. Rates of citation were obtained from the Web of Science (1).

1. Thomson Reuters (2012) *Web of Science*. Available at <http://webofknowledge.com/WOS>. Accessed June 22, 2012.

## Other Supporting Information Files

[Table S1 \(DOCX\)](#)

[Table S2 \(DOCX\)](#)
